# Supplementary material
Source: PubMed Central journal article supplement (PMC7587093)

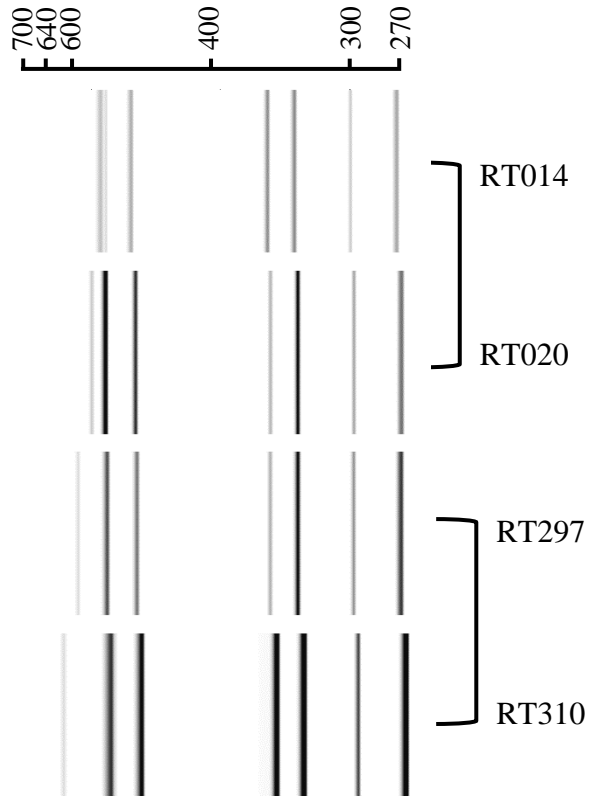

Supplementary Figure 1. PCR RT banding patterns (bps) for RTs 014, 020, 297 and 310.

Supplement: JCM.01552-20-s0001.pdf [file JCM.01552-20-s0001.pdf]
